# Supplementary material for: p53 and metabolism: from mechanism to therapeutics
Source: PubMed Central journal article supplement (PMC5955117; doi:10.18632/oncotarget.25267), 2018-05-04
Supplement: oncotarget-09-23780-s001.pdf [file oncotarget-09-23780-s001.pdf]

## **p53 and metabolism: from mechanism to therapeutics**

### **SUPPLEMENTARY MATERIALS**

**Supplementary Table 1: Mutant p53 induction/repression of genes involved in metabolism or nuclear/cytoplasmic localization.** See Supplementary\_Table\_1
